# Supplementary material
Source: ML conference proceedings conference paper supplement (https://openaccess.thecvf.com/content/CVPR2022/html/Han_Temporal_Alignment_Networks_CVPR_2022_paper.html)
Supplement: Supplementary file 2 [file Han_Temporal_Alignment_Networks_CVPR_2022_supplemental.zip]

Archive with 8 entries (7 files):
- 02107-supp/
- 02107-supp/supp.pdf
- 02107-supp/tan-audio--0XlcSx1lNs.mp4
- 02107-supp/tan-audio--3gqm0u9Vs8.mp4
- 02107-supp/tan-x2--0XlcSx1lNs.mp4
- 02107-supp/tan-x2--3gqm0u9Vs8.mp4
- 02107-supp/tan-x2--3O60sQ1pBo.mp4
- 02107-supp/tan-x2---34IDLn_Zk.mp4
